# Supplementary material
Source: PubMed Central journal article supplement (PMC4794619)
Supplement: 220e6c3932d413b47bd192f8f112dc80_brain-2015-00662-File009.pdf [file 220e6c3932d413b47bd192f8f112dc80_brain-2015-00662-File009.pdf]

|                                            |           | Monkey V |                   | Monkey L |                     | V & L<br>Both<br>directions |
|--------------------------------------------|-----------|----------|-------------------|----------|---------------------|-----------------------------|
|                                            |           | Flexion  | Extension         | Flexion  | Extension           |                             |
| <b>RT</b><br><b>(msec)</b>                 | pre-MPTP  | 280±36   | 301±41            | 252±27   | 278±24              | +30.6%                      |
|                                            | post-MPTP | 324±86   | ***<br>### 376±87 | 328±39   | ***<br>### 421±106  |                             |
| <b>MD</b><br><b>(msec)</b>                 | pre-MPTP  | 382±52   | 353±53            | 334±39   | 428±67              | +23.2%                      |
|                                            | post-MPTP | 550±140  | ***<br>### 490±59 | 381±57   | ***<br>### 411±72   |                             |
| <b>Vel<sub>max</sub></b><br><b>(deg/s)</b> | pre-MPTP  | 137±15   | 140±17            | 128±17   | 104±12              | -23.4%                      |
|                                            | post-MPTP | 62±13    | ***<br>### 92±15  | 138±28   | ### 91±19           |                             |
| <b>Ampl</b><br><b>(cm)</b>                 | pre-MPTP  | 19.6±0.7 | 19.7±0.6          | 20.1±0.9 | 19.7±0.7            | -0.6%                       |
|                                            | post-MPTP | 14.4±2.8 | ***<br>### 2288±4 | 22.6±3.4 | ***<br>### 18.9±4.7 |                             |

**Supplementary Table 1. Task performance was impaired following MPTP administration.**

Kinematic measures (cross-session means  $\pm$  s.e.m.) from pre-MPTP and post-MPTP periods for flexion and extension movements in the visuomotor step-tracking task. Reaction times (RT), movement durations (MD), peak velocities (Vel<sub>max</sub>), and movement amplitudes (Ampl) were compared between states (two-way ANOVA, MPTP x direction). The right column summarizes the size of the effect of MPTP on each performance measure averaged across animals and movement directions. \*\*\* Main effect of MPTP at  $P < 0.001$ . ### MPTP x direction interaction at  $P < 0.001$ .

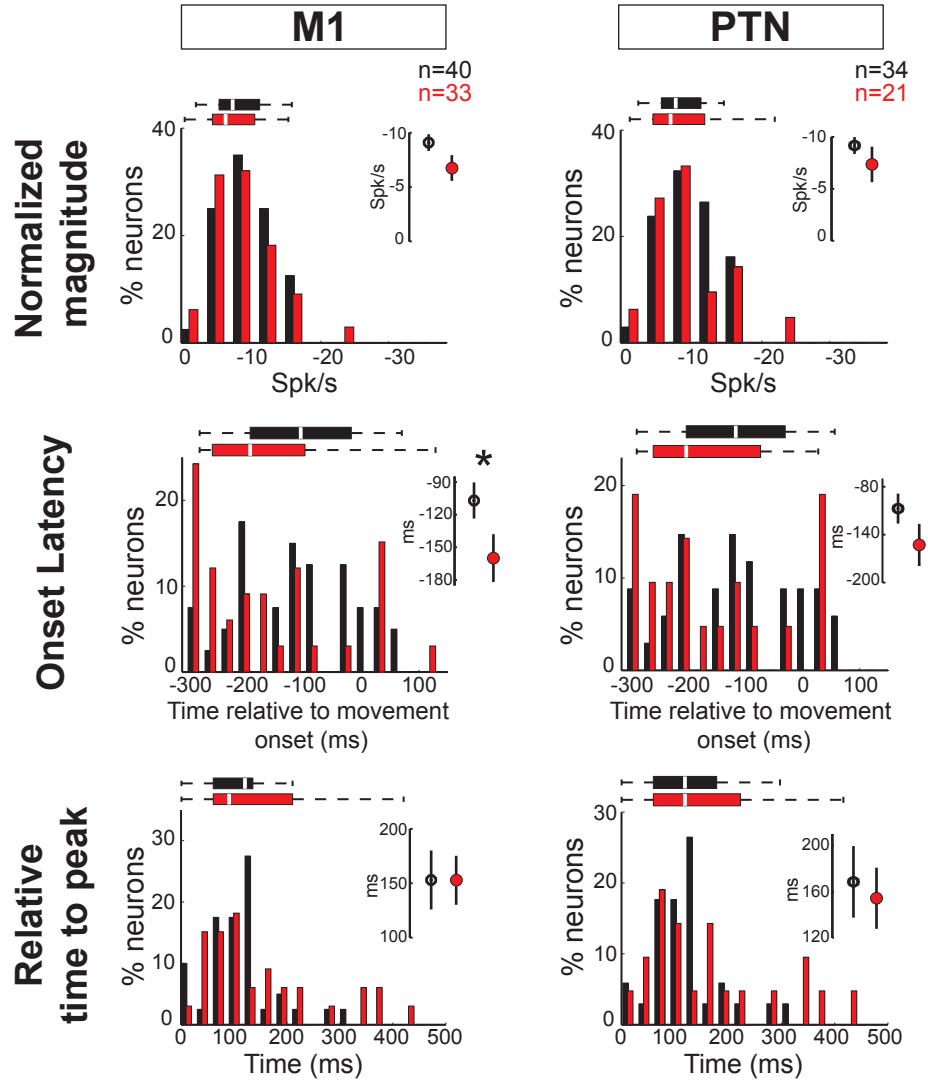

**Supplementary Figure 1.** MPTP effects on kinematic-independent (“residual”) decreases in firing. The distributions of response magnitude (top), onset latency (middle) and relative time to peak (bottom) are plotted for decrease-type response residuals sampled before (black) and after (red) MPTP administration. The figure is formatted following the conventions outlined for Figure 7. A small number ( $n=2$ ) of decreases were detected in CSNs, preventing a comparison between MPTP states. The only significant result for decrease-type residuals was a shift to earlier onset times within the general population of M1 neurons (\* $P<0.05$ , Mann-Whitney U-test).
